# Supplementary material for: Inverse opal structured Ag/TiO2plasmonic photocatalyst prepared by pulsed current deposition and its enhanced visible light photocatalytic activity
Source: Royal Society of Chemistry journal article supplement (doi:10.1039/c3ta13985a), 2013-10-24
Supplement: c3ta13985a.pdf [file c3ta13985a.pdf]

## Supporting Information

### **Inverse opal structured Ag/TiO<sub>2</sub> plasmonic photocatalyst prepared by pulsed current deposition and its enhanced visible light photocatalytic activity**

Zhiyuan Chen<sup>a</sup>, Liang Fang<sup>\*a</sup>, Wen Dong<sup>a</sup>, Fengang Zheng<sup>a</sup>, Mingrong Shen<sup>a</sup> and  
Junling Wang<sup>\*b</sup>

<sup>a</sup>*Jiangsu Key Laboratory of Thin Films and Department of Physics, Soochow University, Suzhou, 215006,  
People's Republic of China*

<sup>b</sup>*School of Materials Science and Engineering, Nanyang Technological University, Singapore 639798, Singapore*

\* Author to whom correspondence should be addressed. e-mail: lfang@suda.edu.cn;  
jllwang@ntu.edu.sg

Summary: There are 4 pages including 4 figures

**Fig. S1**

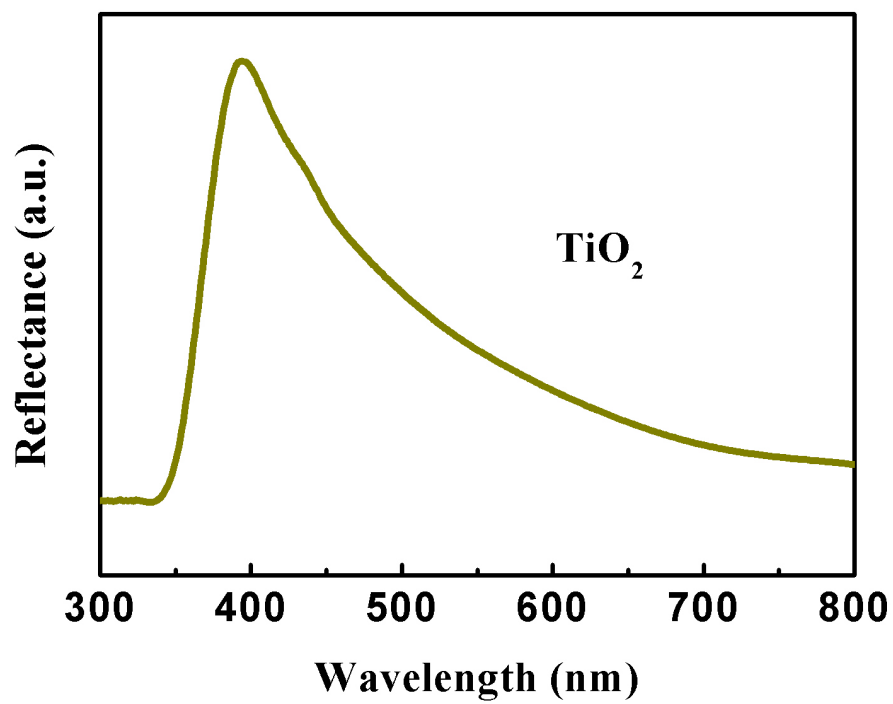

Figure S1. The reflectance spectrum of TiO<sub>2</sub> inverse opals.

**Fig. S2**

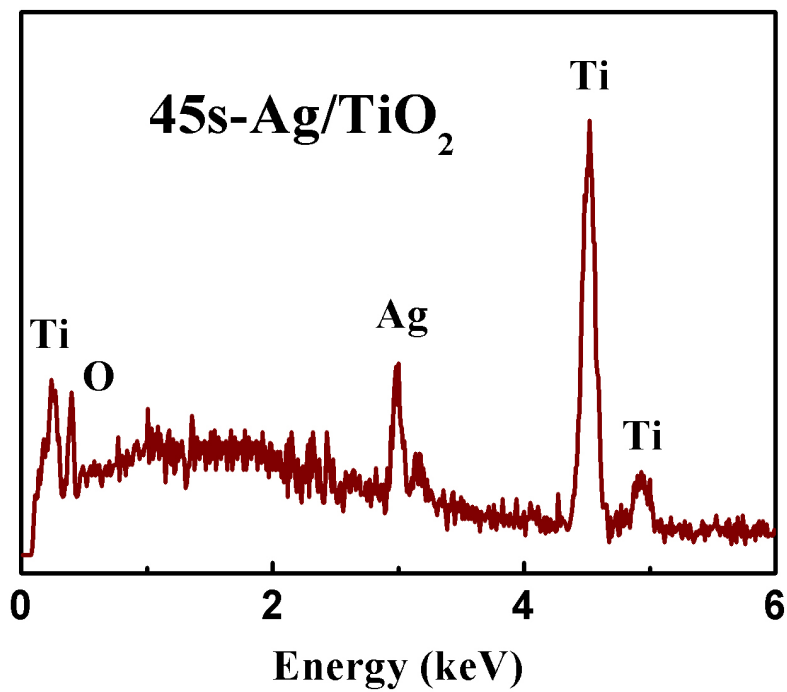

Figure S2. The EDX spectrum of the 45s-Ag/TiO<sub>2</sub> sample.

**Fig. S3**

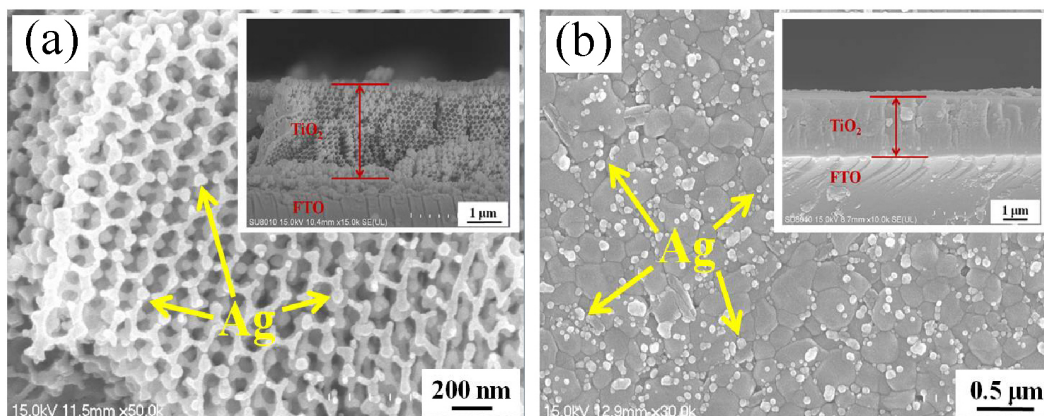

Figure S3. (a) and (b) show the SEM images of the disordered porous Ag/TiO<sub>2</sub> and the Ag/TiO<sub>2</sub> films (top view and cross-section view). The disordered porous TiO<sub>2</sub> structure was prepared from a randomly packed template formed with a mixture of 225 and 260 nm PS spheres under the same conditions as the inverse opals. The TiO<sub>2</sub> films were fabricated by spin coating using the same precursor.

Fig. S4

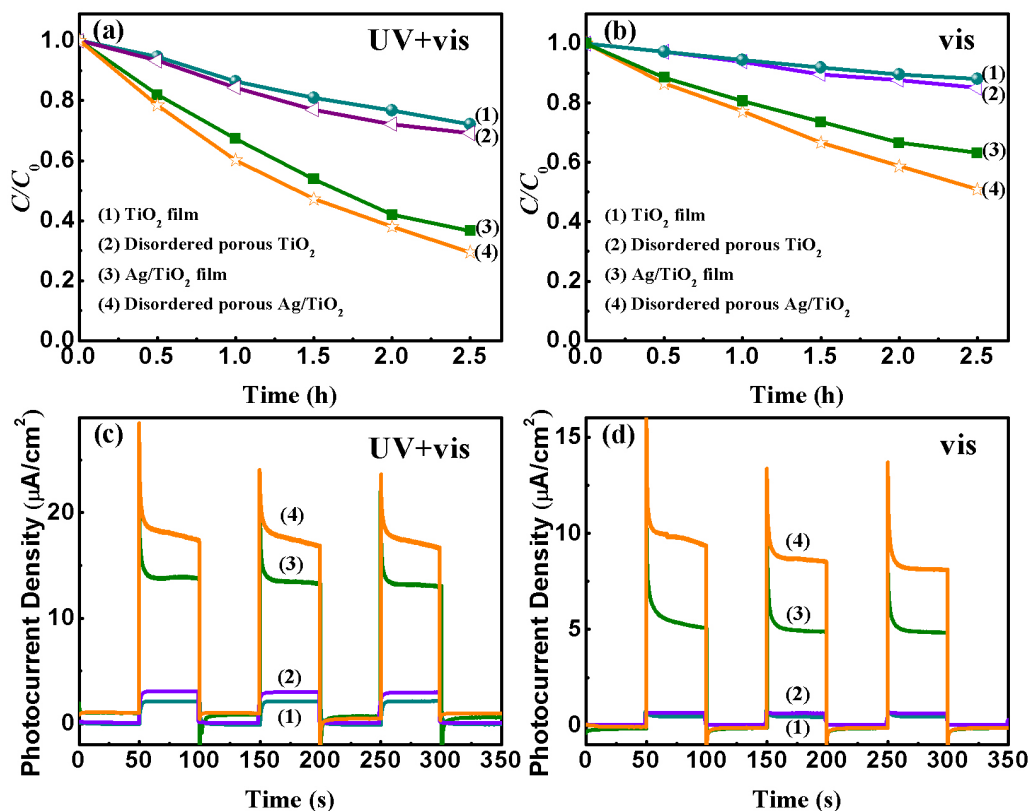

Figure S4. (a) Photocatalytic degradation efficiencies of MB using the disordered porous Ag/TiO<sub>2</sub> and Ag/TiO<sub>2</sub> films under UV-visible light illumination; (b) Photocatalytic degradation efficiencies of RhB using the disordered porous Ag/TiO<sub>2</sub> and Ag/TiO<sub>2</sub> films under visible light illumination; (c) Photocurrent densities vs time for the corresponding samples at under UV-visible light illumination; (d) Photocurrent densities vs time for the corresponding samples at under visible light illumination.
